# Supplementary material for: Synthesis of Flower-like ZnO and Its Enhanced Sensitivity towards NO2 Gas Detection at Room Temperature
Source: MDPI journal article supplement (doi:10.3390/chemosensors11060322), 2023-06-01
Supplement: s1 [file s1]

Archive with 1 entries (1 files):
- chemosensors-2355989-supplementary.pdf
