# Supplementary material for: Synthesis of Flower-like ZnO and Its Enhanced Sensitivity towards NO2 Gas Detection at Room Temperature
Source: MDPI journal article supplement (doi:10.3390/chemosensors11060322), 2023-06-01
Supplement: s1 [file s1 › chemosensors-2355989-supplementary.pdf]

Supplementary material

# Synthesis of Flower-like ZnO and Its Enhanced Sensitivity towards NO<sub>2</sub> Gas Detection at Room Temperature

Zhicheng Cai <sup>1</sup>, Jiho Park <sup>2</sup> and Sunghoon Park <sup>3,4,\*</sup>

<sup>1</sup> Department of Software Convergence, Sejong University, 209 Neungdong-ro, Gwangjin-gu, Seoul 05006, Republic of Korea; cai1121@hotmail.com

<sup>2</sup> Department of Electronics and Information Engineering, Sejong University, 209 Neungdong-ro, Gwangjin-gu, Seoul 05006, Republic of Korea; jjpjh5483@naver.com

<sup>3</sup> Department of Intelligent and Mechatronics Engineering, Sejong University, 209 Neungdong-ro, Gwangjin-gu, Seoul 05006, Republic of Korea

<sup>4</sup> Department of Semiconductor System Engineering, Sejong University, 209 Neungdong-ro, Gwangjin-gu, Seoul 05006, Republic of Korea

\* Correspondence: s.park@sejong.ac.kr; Tel.: +82-2-6935-2522

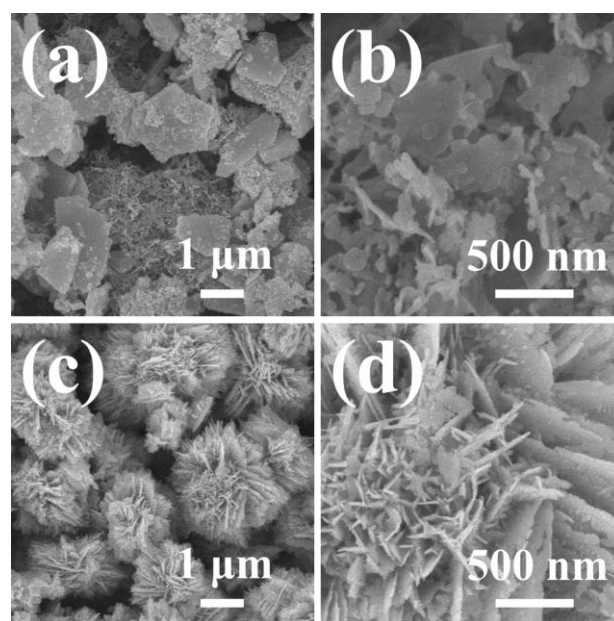

**Figure S1.** FESEM images of the formation stages obtained at (a) 0.3 g, and (c) 0.6 g NaOH, (b) and (d) represent corresponding high-magnification images.

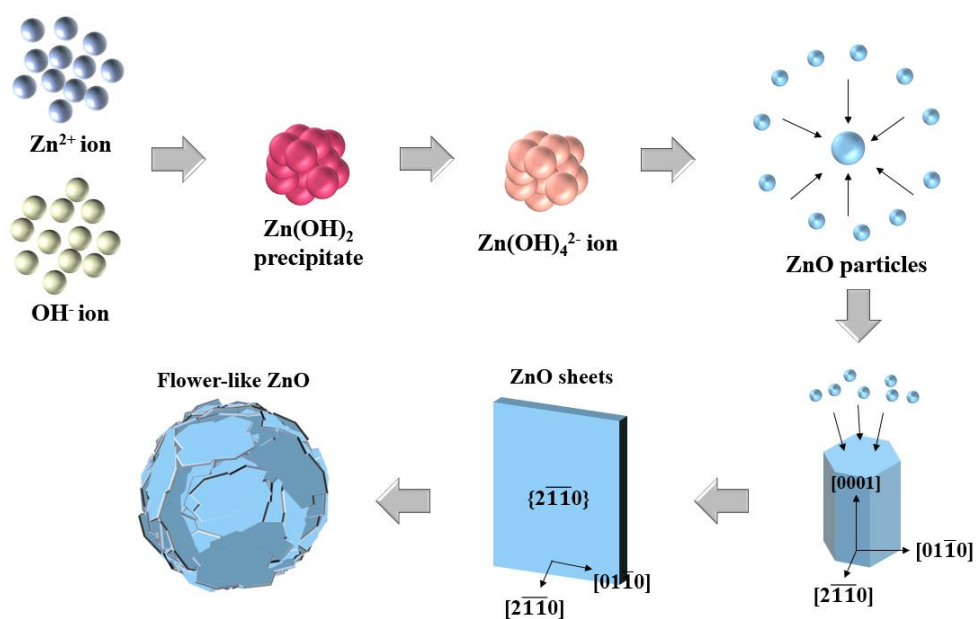

**Figure S2.** Formation of the flower-like ZnO, and the schematic illustration of the formation process and mechanism.

**Table S1.** Average crystallite sizes of 0ZnO, 4ZnO, 6ZnO, and 8ZnO synthesized in this work.

| Sample                         | 0ZnO  | 4ZnO  | 6ZnO  | 8ZnO  |
|--------------------------------|-------|-------|-------|-------|
| Crystallite average sizes (nm) | 16.56 | 19.91 | 21.81 | 35.35 |
